# Supplementary material for: Suppression of autophagic activity by Rubicon is a signature of aging
Source: PubMed Central journal article supplement (PMC6381146; doi:10.1038/s41467-019-08729-6), 2019-02-19
Supplement: 41467_2019_8729_MOESM3_ESM.pdf [file 41467_2019_8729_MOESM3_ESM.pdf]

## Description of Additional Supplementary Files

**File Name:** Supplementary Data 1

**Description:** Detailed lifespan data with repeats and statistics.
